# Supplementary material for: Development of a New Type of Flame Retarded Biocomposite Reinforced with a Biocarbon/Basalt Fiber System: A Comparative Study between Poly(lactic Acid) and Polypropylene
Source: MDPI journal article supplement (doi:10.3390/polym14194086), 2022-09-29
Supplement: s1 [file s1]

## Supplementary information

# Development of the new type of flame retarded biocomposites reinforced with biocarbon/basalt fiber system. The comparative study between poly(lactic acid) and polypropylene

Jacek Andrzejewski <sup>1,\*</sup>, Sławonir Michałowski <sup>2</sup>

<sup>1</sup> Poznan University of Technology, Faculty of Mechanical Engineering, Institute of Materials Technology, Piotrowo 3 Stree PL-61-138 Poznan, Poland

<sup>2</sup> Faculty of Chemical Engineering and Technology, Cracow University of Technology, Warszawska 24, 31-155 Krakow, Poland

\* Correspondence: jacek.andrzejewski@put.poznan.pl; Tel.: +48 61 665 5858 (optional; include country code; if there are multiple corresponding authors, add author initials)

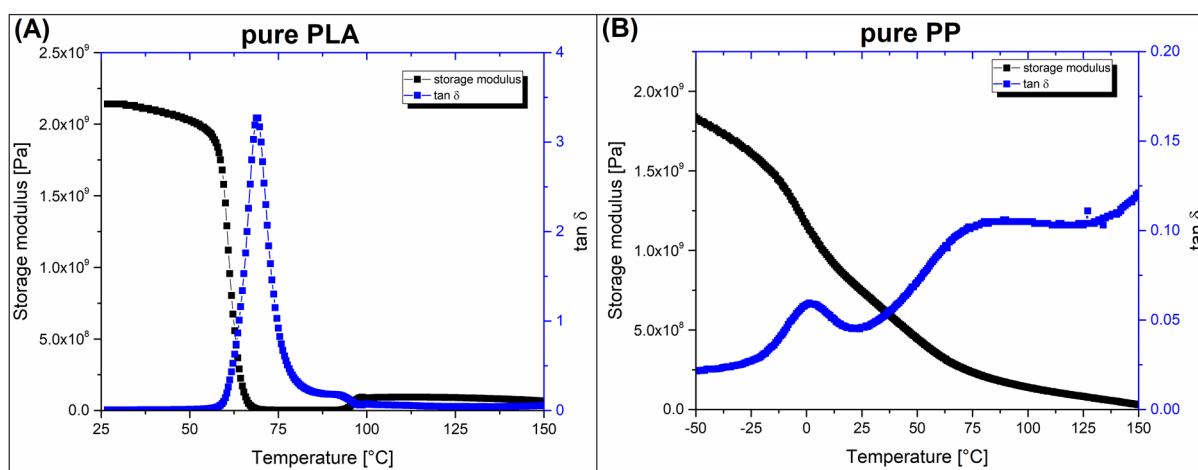

Figure S1. The storage modulus/tan  $\delta$  plots for (A) pure PLA and (B) pure PP sample.

Table S1. The basic data collected during the thermogravimetric (TGA) measurements.

|                             | T <sub>5%</sub><br>[°C] | DTG <sub>peak1</sub><br>[°C] | DTG <sub>peak2</sub><br>[°C] | Residual char<br>[%] |
|-----------------------------|-------------------------|------------------------------|------------------------------|----------------------|
| <b>PLA-based composites</b> |                         |                              |                              |                      |
| PLA pure                    | 325                     | 362                          | -                            | 2.4                  |
| PLA/EX20                    | 330                     | 360                          | 540                          | 10.5                 |
| PLA/BC20                    | 317                     | 345                          | -                            | 20.9                 |
| PLA/BF20                    | 328                     | 360                          | -                            | 19.8                 |
| PLA/EX20/BC20               | 327                     | 350                          | 495                          | 31.8                 |
| PLA/EX20/BF20               | 327                     | 355                          | -                            | 33.0                 |
| PLA/EX20/(BC-BF)20          | 328                     | 352                          | -                            | 35.9                 |
| <b>PP-based composites</b>  |                         |                              |                              |                      |
| PP pure                     | 400                     | 452                          | -                            | 7.3                  |
| PP/EX20                     | 388                     | 465                          | -                            | 18.8                 |
| PP/BC20                     | 443                     | 470                          | -                            | 23.4                 |

|                   |     |     |     |      |
|-------------------|-----|-----|-----|------|
| PP/BF20           | 407 | 457 | -   | 22.5 |
| PP/EX20/BC20      | 437 | 480 | 550 | 26.3 |
| PP/EX20/BF20      | 393 | 470 | -   | 36.3 |
| PP/EX20/(BC-BF)20 | 435 | 481 | 535 | 34.1 |

Table S2. The results of DSC measurements from 1<sup>st</sup> heating and cooling stage.

| Sample                   | T <sub>m</sub> peak<br>[°C] | T <sub>cc</sub> peak<br>[°C] | T <sub>c</sub><br>[°C] | H <sub>cc</sub><br>[J/g] | H <sub>m</sub><br>[J/g] | X <sub>c</sub><br>[%] |
|--------------------------|-----------------------------|------------------------------|------------------------|--------------------------|-------------------------|-----------------------|
| <b>PLA-based samples</b> |                             |                              |                        |                          |                         |                       |
| PLA                      | 170.5                       | 109.9                        | -                      | 38.9                     | 48.6                    | 10.3                  |
| PLA/EX20                 | 169.6                       | 101.4                        | -                      | 25.4                     | 41.2                    | 21.2                  |
| PLA/BC20                 | 169.8                       | 98.8                         | 94.2                   | 24.1                     | 40.6                    | 22.1                  |
| PLA/BF20                 | 169.9                       | 104.6                        | -                      | 29.3                     | 40.8                    | 15.3                  |
| PLA/EX20/BC20            | 169.2                       | 99.6                         | 93.0                   | 21.7                     | 33.3                    | 20.6                  |
| PLA/EX20/BF20            | 168.1                       | 102.1                        | -                      | 26.2                     | 37.4                    | 20.0                  |
| PLA/EX20/(BC-BF)20       | 169.8                       | 100.2                        | 94.5                   | 22.6                     | 32.5                    | 17.6                  |
| <b>PP-based samples</b>  |                             |                              |                        |                          |                         |                       |
| PP                       | 167.6                       | -                            | 113.4                  | -                        | 101                     | 48.8                  |
| PP/EX20                  | 165.0                       | -                            | 117.3                  | -                        | 84.4                    | 51.0                  |
| PP/BC20                  | 165.7                       | -                            | 118.6                  | -                        | 82.4                    | 49.8                  |
| PP/BF20                  | 168.6                       | -                            | 113.3                  | -                        | 73.1                    | 44.1                  |
| PP/EX20/BC20             | 164.9                       | -                            | 119.1                  | -                        | 60.7                    | 48.9                  |
| PP/EX20/BF20             | 164.8                       | -                            | 116.9                  | -                        | 61.8                    | 49.8                  |
| PP/EX20/(BC-BF)20        | 165.1                       | -                            | 119.1                  | -                        | 59.3                    | 47.8                  |

Table S3. The list of mechanical properties obtained during the static tensile/flexural measurements and Izod impact tests.

| Tensile test             |             |             |                     | Flexural test |              | Izod test            |
|--------------------------|-------------|-------------|---------------------|---------------|--------------|----------------------|
|                          | Modulus     | Strength    | Elongation at break | Modulus       | Strength     | Impact strength      |
|                          | [MPa]       | [MPa]       | [%]                 | [MPa]         | [MPa]        | [kJ/m <sup>2</sup> ] |
| <b>PLA-based samples</b> |             |             |                     |               |              |                      |
| PLA pure                 | 2880 (±124) | 62.7 (±0.1) | 3.1 (±0.2)          | 3560 (±62)    | 112.0 (±0.1) | 2.6 (±0.3)           |
| PLA/EX20                 | 3410 (±94)  | 40.0 (±0.6) | 7.1 (±1.8)          | 3580 (±63)    | 77.8 (±0.7)  | 3.4 (±0.8)           |
| PLA/BC20                 | 3650 (±7)   | 61.0 (±1.5) | 2.1 (±0.1)          | 3780 (±75)    | 85.5 (±1.9)  | 2.5 (±0.3)           |
| PLA/BF20                 | 6516 (±75)  | 92.5 (±0.5) | 2.4 (±0.1)          | 6630 (±200)   | 99.4 (±1.2)  | 5.9 (±0.3)           |
| PLA/EX20/BC20            | 4170 (±116) | 44.3 (±0.9) | 1.4 (±0.1)          | 5100 (±129)   | 80.1 (±1.8)  | 2.0 (±0.2)           |
| PLA/EX20/BF20            | 6507 (±447) | 66.6 (±3.5) | 1.5 (±0.1)          | 6630 (±200)   | 99.4 (±1.2)  | 4.3 (±1.1)           |
| PLA/EX20(BC-BF)20        | 5150 (±179) | 58.0 (±1.3) | 1.6 (±0.1)          | 6400 (±85)    | 93.0 (±2.8)  | 2.7 (±0.1)           |
| <b>PP-based samples</b>  |             |             |                     |               |              |                      |
| PP pure                  | 1470 (±27)  | 30.7 (±0.4) | 250.0 (±70.0)       | 1030 (±41)    | 30.6 (±0.3)  | 2.7 (±0.9)           |
| PP/EX20                  | 1600 (±29)  | 23.1 (±0.1) | 130.0 (±60.0)       | 1440 (±30)    | 34.2 (±0.3)  | 2.4 (±0.4)           |

|                  |                    |                    |                   |                    |                    |                   |
|------------------|--------------------|--------------------|-------------------|--------------------|--------------------|-------------------|
| PP/BC20          | 1750 ( $\pm 85$ )  | 26.5 ( $\pm 0.3$ ) | 5.9 ( $\pm 0.3$ ) | 1660 ( $\pm 29$ )  | 41.8 ( $\pm 0.3$ ) | 2.6 ( $\pm 0.6$ ) |
| PP/BF20          | 3280 ( $\pm 113$ ) | 32.8 ( $\pm 0.2$ ) | 3.4 ( $\pm 0.2$ ) | 3030 ( $\pm 132$ ) | 50.5 ( $\pm 0.6$ ) | 3.8 ( $\pm 0.7$ ) |
| PP/EX20/BC20     | 1820 ( $\pm 16$ )  | 22.7 ( $\pm 0.3$ ) | 4.7 ( $\pm 0.3$ ) | 2440 ( $\pm 101$ ) | 46.2 ( $\pm 1.6$ ) | 2.1 ( $\pm 0.5$ ) |
| PP/EX20/BF20     | 4020 ( $\pm 65$ )  | 30.5 ( $\pm 0.6$ ) | 1.8 ( $\pm 0.1$ ) | 3930 ( $\pm 216$ ) | 50.2 ( $\pm 1.1$ ) | 4.2 ( $\pm 0.6$ ) |
| PP/EX20(BC-BF)20 | 2770 ( $\pm 26$ )  | 39.9 ( $\pm 1.1$ ) | 4.6 ( $\pm 0.1$ ) | 3270 ( $\pm 86$ )  | 66.8 ( $\pm 1.2$ ) | 4.0 ( $\pm 0.1$ ) |

Table S4. Results obtained during testing of PLA and PP-based composites using a PCFC microcalorimeter.

|                             | pHRR<br>[W/g] | T <sub>pHRR</sub><br>[°C] | t <sub>pHRR</sub><br>[s] | HRC<br>[J/g·K] | THR<br>[kJ/g]  |
|-----------------------------|---------------|---------------------------|--------------------------|----------------|----------------|
| <b>PLA-based composites</b> |               |                           |                          |                |                |
| PLA pure                    | 619 $\pm$ 90  | 980 $\pm$ 8               | 337 $\pm$ 3              | 672 $\pm$ 105  | 20.0 $\pm$ 0.1 |
| PLA/EX20                    | 385 $\pm$ 3   | 381 $\pm$ 1               | 330 $\pm$ 6              | 412 $\pm$ 1    | 16.8 $\pm$ 0.4 |
| PLA/BC20                    | 412 $\pm$ 5   | 363 $\pm$ 4               | 318 $\pm$ 6              | 448 $\pm$ 6    | 15.8 $\pm$ 0.1 |
| PLA/BF20                    | 476 $\pm$ 8   | 372 $\pm$ 4               | 330 $\pm$ 1              | 519 $\pm$ 11   | 16.0 $\pm$ 0.1 |
| PLA/EX20/BC20               | 250 $\pm$ 9   | 372 $\pm$ 1               | 321 $\pm$ 2              | 269 $\pm$ 9    | 12.1 $\pm$ 0.2 |
| PLA/EX20/BF20               | 311 $\pm$ 1   | 380 $\pm$ 1               | 332 $\pm$ 8              | 335 $\pm$ 20   | 14.1 $\pm$ 0.1 |
| PLA/EX20/(BC-BF)20          | 290 $\pm$ 7   | 374 $\pm$ 1               | 328 $\pm$ 5              | 315 $\pm$ 7    | 12.4 $\pm$ 0.8 |
| <b>PP-based composites</b>  |               |                           |                          |                |                |
| PP pure                     | 1110 $\pm$ 35 | 472 $\pm$ 1               | 425 $\pm$ 13             | 1208 $\pm$ 13  | 45.8 $\pm$ 0.4 |
| PP/EX20                     | 653 $\pm$ 28  | 479 $\pm$ 1               | 438 $\pm$ 12             | 1046 $\pm$ 48  | 37.4 $\pm$ 0.4 |
| PP/BC20                     | 1024 $\pm$ 25 | 481 $\pm$ 1               | 435 $\pm$ 8              | 1116 $\pm$ 37  | 36.9 $\pm$ 0.8 |
| PP/BF20                     | 920 $\pm$ 39  | 472 $\pm$ 1               | 423 $\pm$ 14             | 1000 $\pm$ 61  | 37.6 $\pm$ 0.3 |
| PP/EX20/BC20                | 745 $\pm$ 24  | 487 $\pm$ 1               | 433 $\pm$ 8              | 803 $\pm$ 17   | 28.4 $\pm$ 0.4 |
| PP/EX20/BF20                | 739 $\pm$ 9   | 481 $\pm$ 1               | 430 $\pm$ 8              | 801 $\pm$ 20   | 34.0 $\pm$ 0.4 |
| PP/EX20/(BC-BF)20           | 695 $\pm$ 35  | 487 $\pm$ 1               | 443 $\pm$ 1              | 761 $\pm$ 38   | 26.7 $\pm$ 0.6 |
